# Supplementary material for: Metabolic Alterations in NADSYN1-Deficient Cells
Source: MDPI journal article supplement (doi:10.3390/metabo13121196), 2023-12-12
Supplement: s1 [file s1]

Supplementary Materials

Table S1. Oligonucleotide sequences used to generate NADSYN1 deficient A549 and HEK293T cells

|            |                                                                  |
|------------|------------------------------------------------------------------|
| NADSYN1 #1 | Forward: GCAAATTGCCCTCGAAGTCC<br>Reverse: GGACTTCGAGGGCAATTTC    |
| NADSYN1 #2 | Forward: GCAGGACATCATCTGCGACGT<br>Reverse: ACGTCGCAGATGATGTCCTGC |

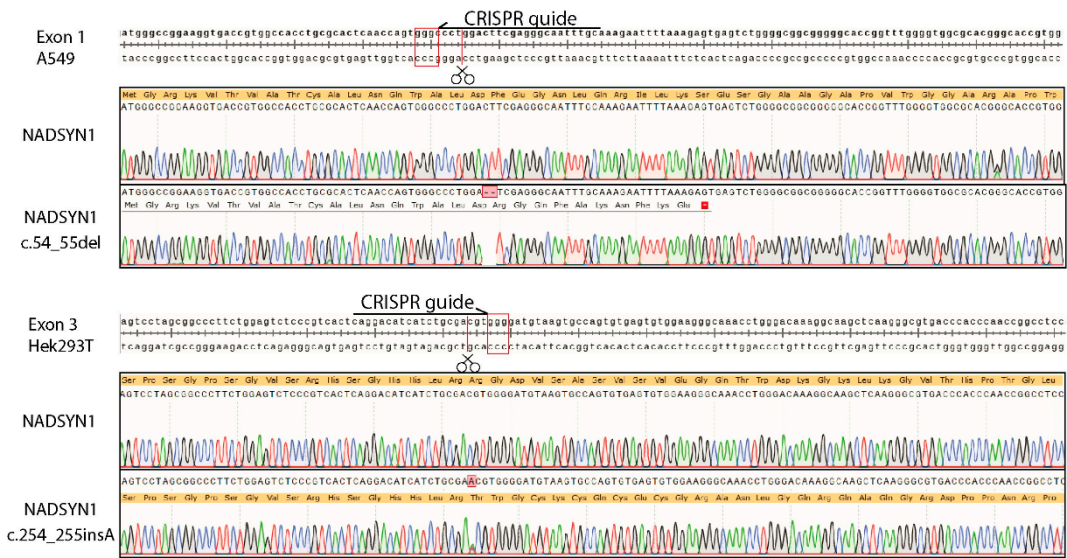

Figure S1. Sequences derived from genomic DNA of wild type and NADSYN1 deficient A549 and HEK293T cells.

Table S2. Primer sequences

|            |                                                                |
|------------|----------------------------------------------------------------|
| NADSYN1 #1 | Forward: gacctgtgtcttctgtctcc<br>Reverse: cctgacctcaggtgacttcc |
| NADSYN1 #2 | Forward: gctgtctattggaatcacct<br>Reverse: ttacggggctgagataggaa |

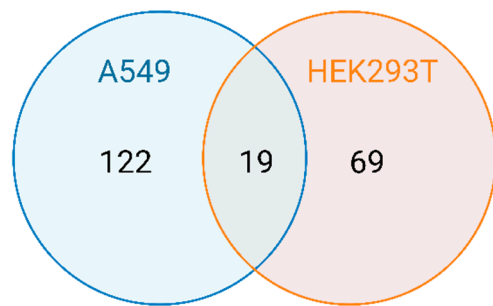

| Metabolite                                 | A549      | HEK293T   |
|--------------------------------------------|-----------|-----------|
| 1D-Myo-inositol 1,4-bisphosphate           | Increased | Increased |
| 2-Amino-3-carboxymuconic acid semialdehyde | Decreased | Decreased |
| 2-Hexenoylcarnitine                        | Decreased | Decreased |

|                                |           |           |
|--------------------------------|-----------|-----------|
| D-Glyceraldehyde 3-phosphate   | Increased | Increased |
| DOPA sulfate                   | Increased | Increased |
| D-Sedoheptulose 7-phosphate    | Increased | Increased |
| Fructose 6-phosphate           | Increased | Increased |
| Galactitol                     | Increased | Increased |
| Gluconolactone                 | Decreased | Decreased |
| Guanosine                      | Increased | Increased |
| L-Homocysteine sulfonic acid   | Increased | Increased |
| Oxoglutaric acid               | Decreased | Decreased |
| Prostaglandin E2               | Decreased | Decreased |
| Sedoheptulose 1,7-bisphosphate | Increased | Increased |
| Ureidosuccinic acid            | Decreased | Decreased |
| Uridine 2',3'-cyclic phosphate | Increased | Increased |
| (S)-5-Diphosphomevalonic acid  | Decreased | Increased |
| Deoxyuridine                   | Decreased | Increased |
| Inosine                        | Increased | Decreased |

**Figure S2.** Venn diagram depicting the overlap between significantly (based on  $FC > 2$  and  $P < 0.05$ ) altered metabolites between A549 and HEK293T cells as a consequence of NADSYN1-/- dependent NAD<sup>+</sup> deficiency. The 19 overlapping metabolites are represented in the table with an additional column indicating whether a metabolite is increased or decreased in A549 and HEK293T cells as a consequence of NADSYN1-/- dependent NAD<sup>+</sup> deficiency. Adapted from “Venn Diagram with Organs (Layout)”, by BioRender.com (2023). Retrieved from <https://app.biorender.com/biorender-templates>.
